# Supplementary material for: Cervical dystonia and pain: characteristics and treatment patterns from CD PROBE (Cervical Dystonia Patient Registry for Observation of OnabotulinumtoxinA Efficacy)
Source: Springer Nature journal article supplement (doi:10.1007/s00415-014-7343-6), 2014-04-21

## Supplemental data

**Online Resource Table 1** Relative importance of the TWSTRS Severity score and PNRS score on the CDIP-58 subscale scores

| CDIP-58 subscale      | Model R <sup>2</sup> | Joint LMG estimate |        |
|-----------------------|----------------------|--------------------|--------|
|                       |                      | TWSTRS Severity    | PNRS   |
| Head and Neck         | 0.2754               | 0.3109             | 0.6891 |
| Pain and Discomfort   | 0.3730               | 0.0162             | 0.9838 |
| Upper Limb Activities | 0.2759               | 0.2092             | 0.7908 |
| Walking               | 0.2225               | 0.4516             | 0.5484 |
| Sleep                 | 0.2464               | 0.0745             | 0.9255 |
| Annoyance             | 0.1309               | 0.1723             | 0.8277 |
| Mood                  | 0.1293               | 0.1663             | 0.8337 |
| Psychosocial          | 0.0960               | 0.5235             | 0.4765 |

*CDIP-58* Cervical Dystonia Impact Profile, *LMG* Lindeman-Merenda-Gold, *PNRS* Pain Numeric Rating Scale, *TWSTRS* Toronto Western Spasmodic Torticollis Rating Scale

**Online Resource Fig. 1** Probabilities of employment status by pain group, age, and gender.

Full time employment was the reference level in this multinomial regression model. “Other” includes student, unemployed, homemaker, and never employed.

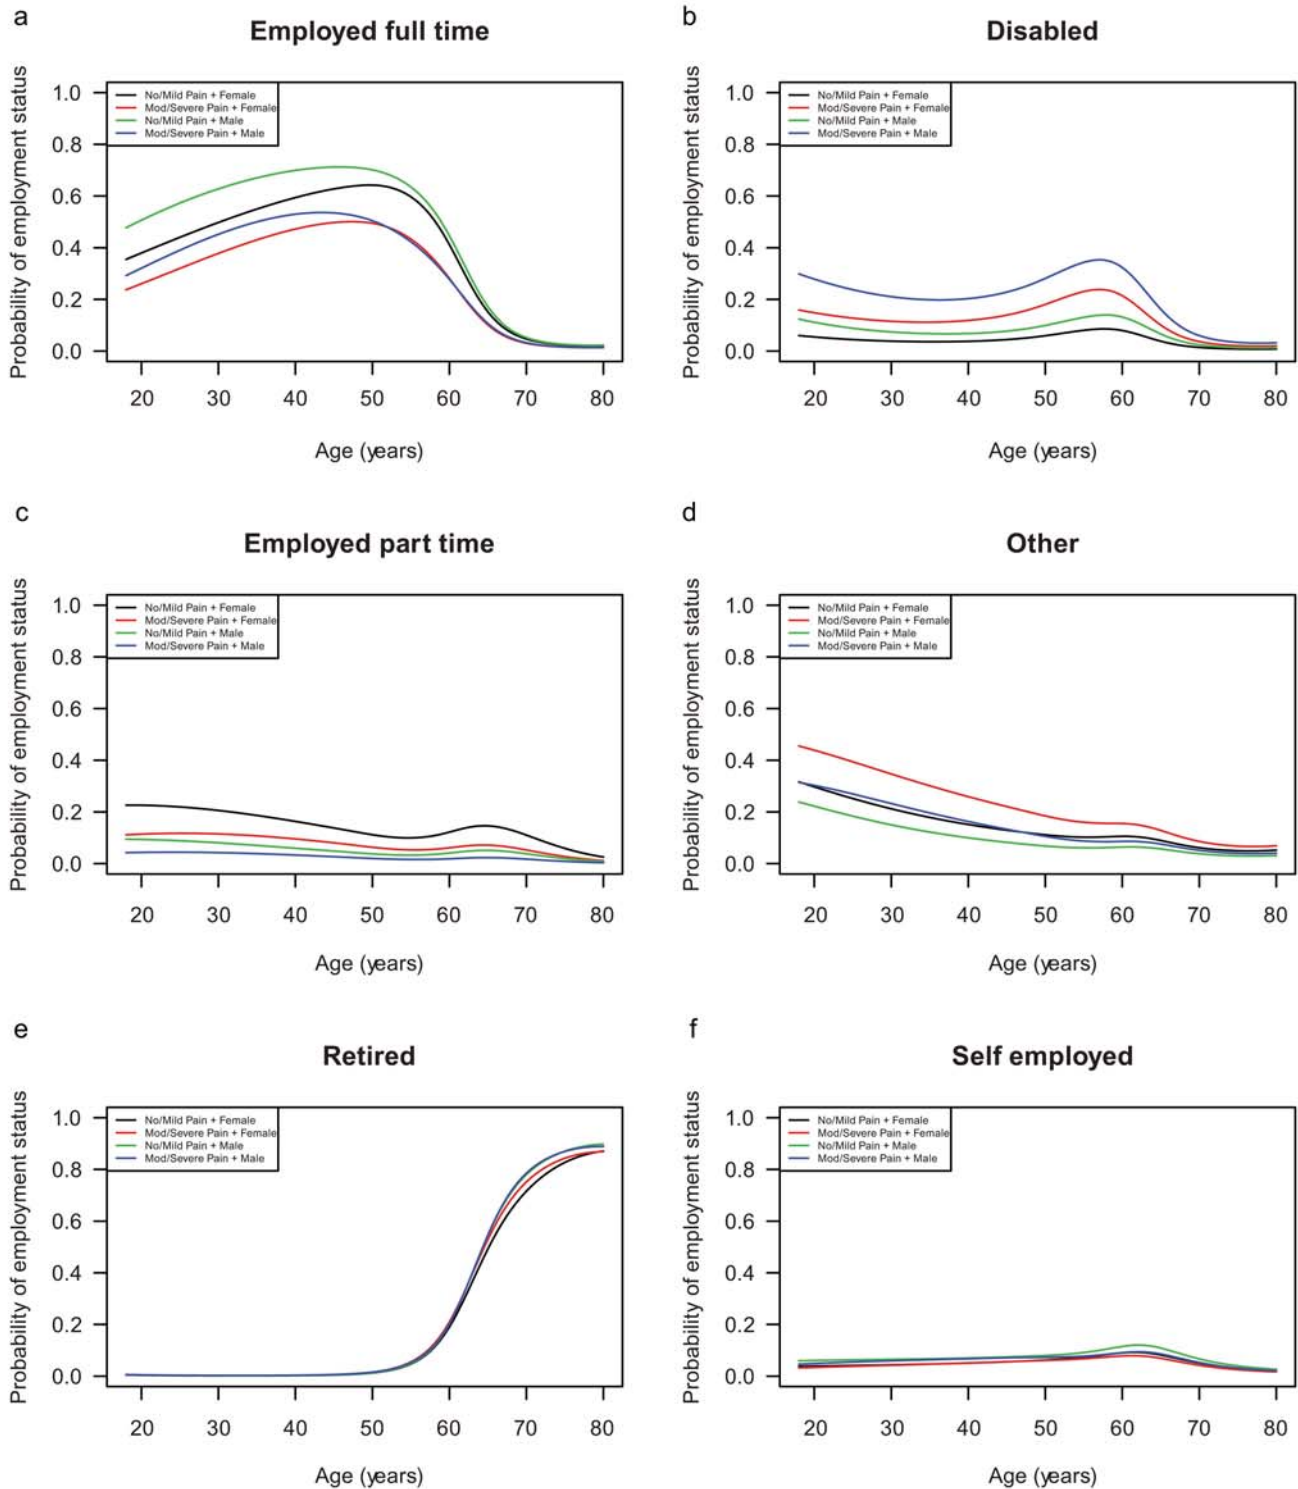

**Online Resource Fig. 2** Effects of pain group, age, gender, and TWSTRS Severity subscale score on a) dose and b) number of muscles injected. Predictions are for age fixed at the observed mean of 58 years. TWSTRS Severity subscale ranges from 0–35. TWSTRS Toronto Western Spasmodic Torticollis Rating Scale

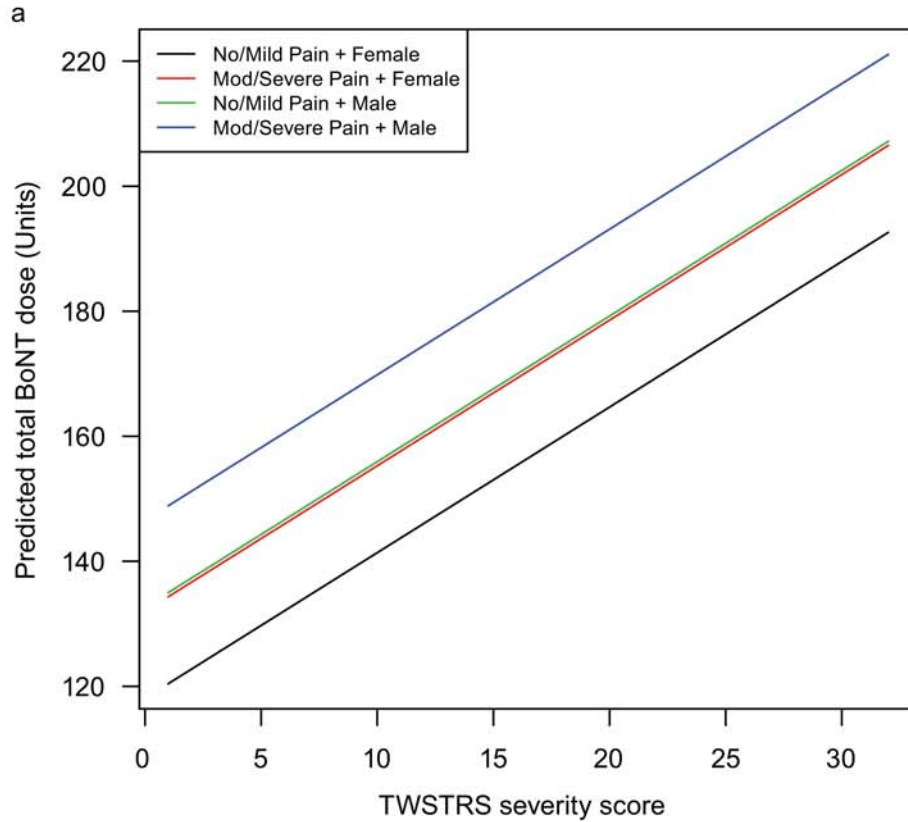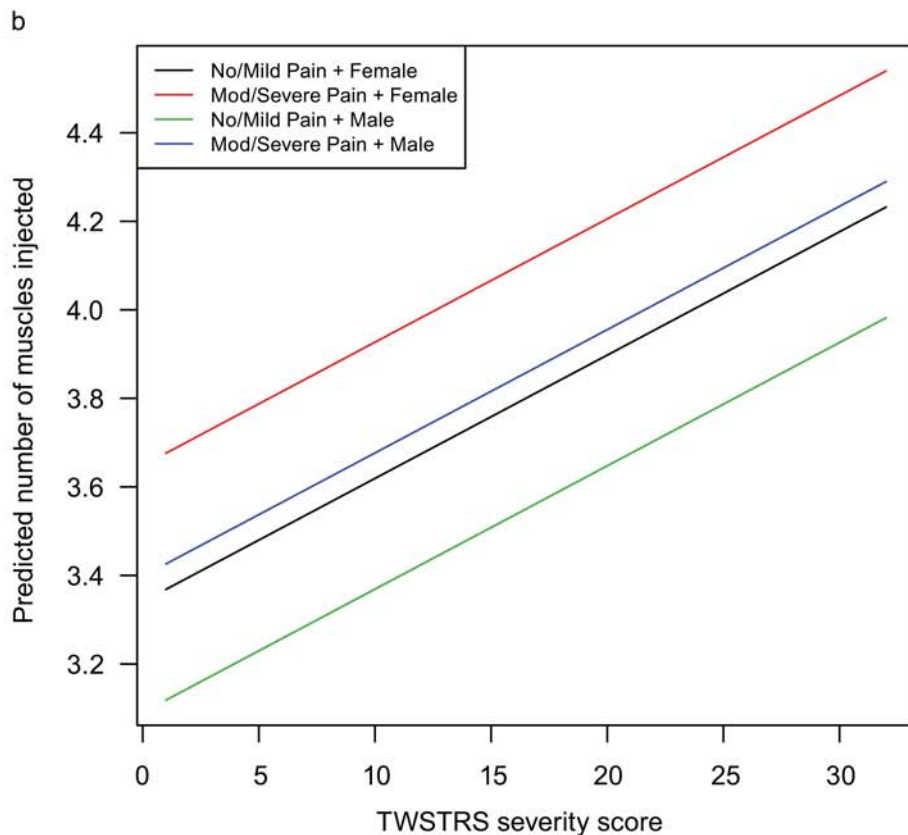

Supplement: MOESM1 [file 8459376]
